# Supplementary material
Source: publisher figshare collection journal article supplement (https://acs.figshare.com/ndownloader/files/10498447)
Supplement: Supplementary file 1 [file 10498447]

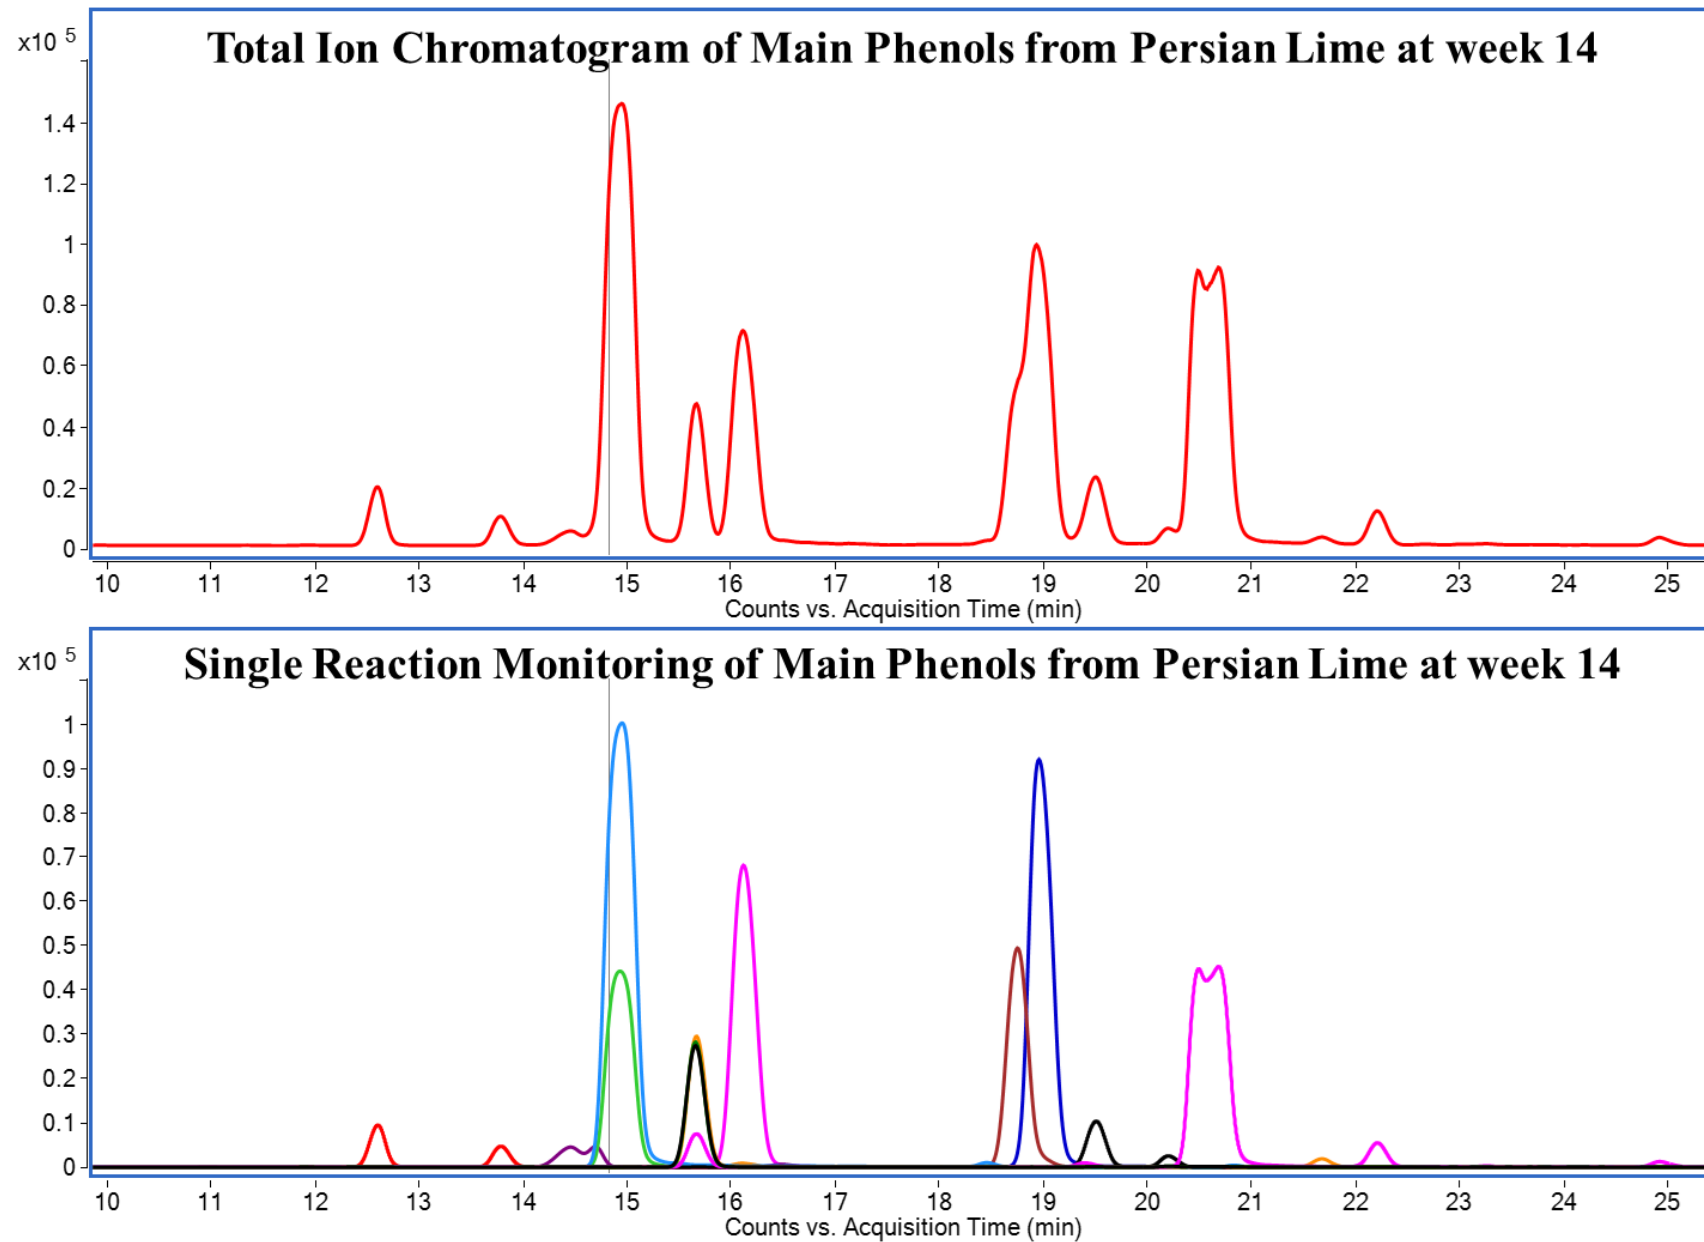

**Supplementary Figure 1.** Total ion chromatogram and single reaction monitoring of the main phenols from Persian lime samples at week 14.

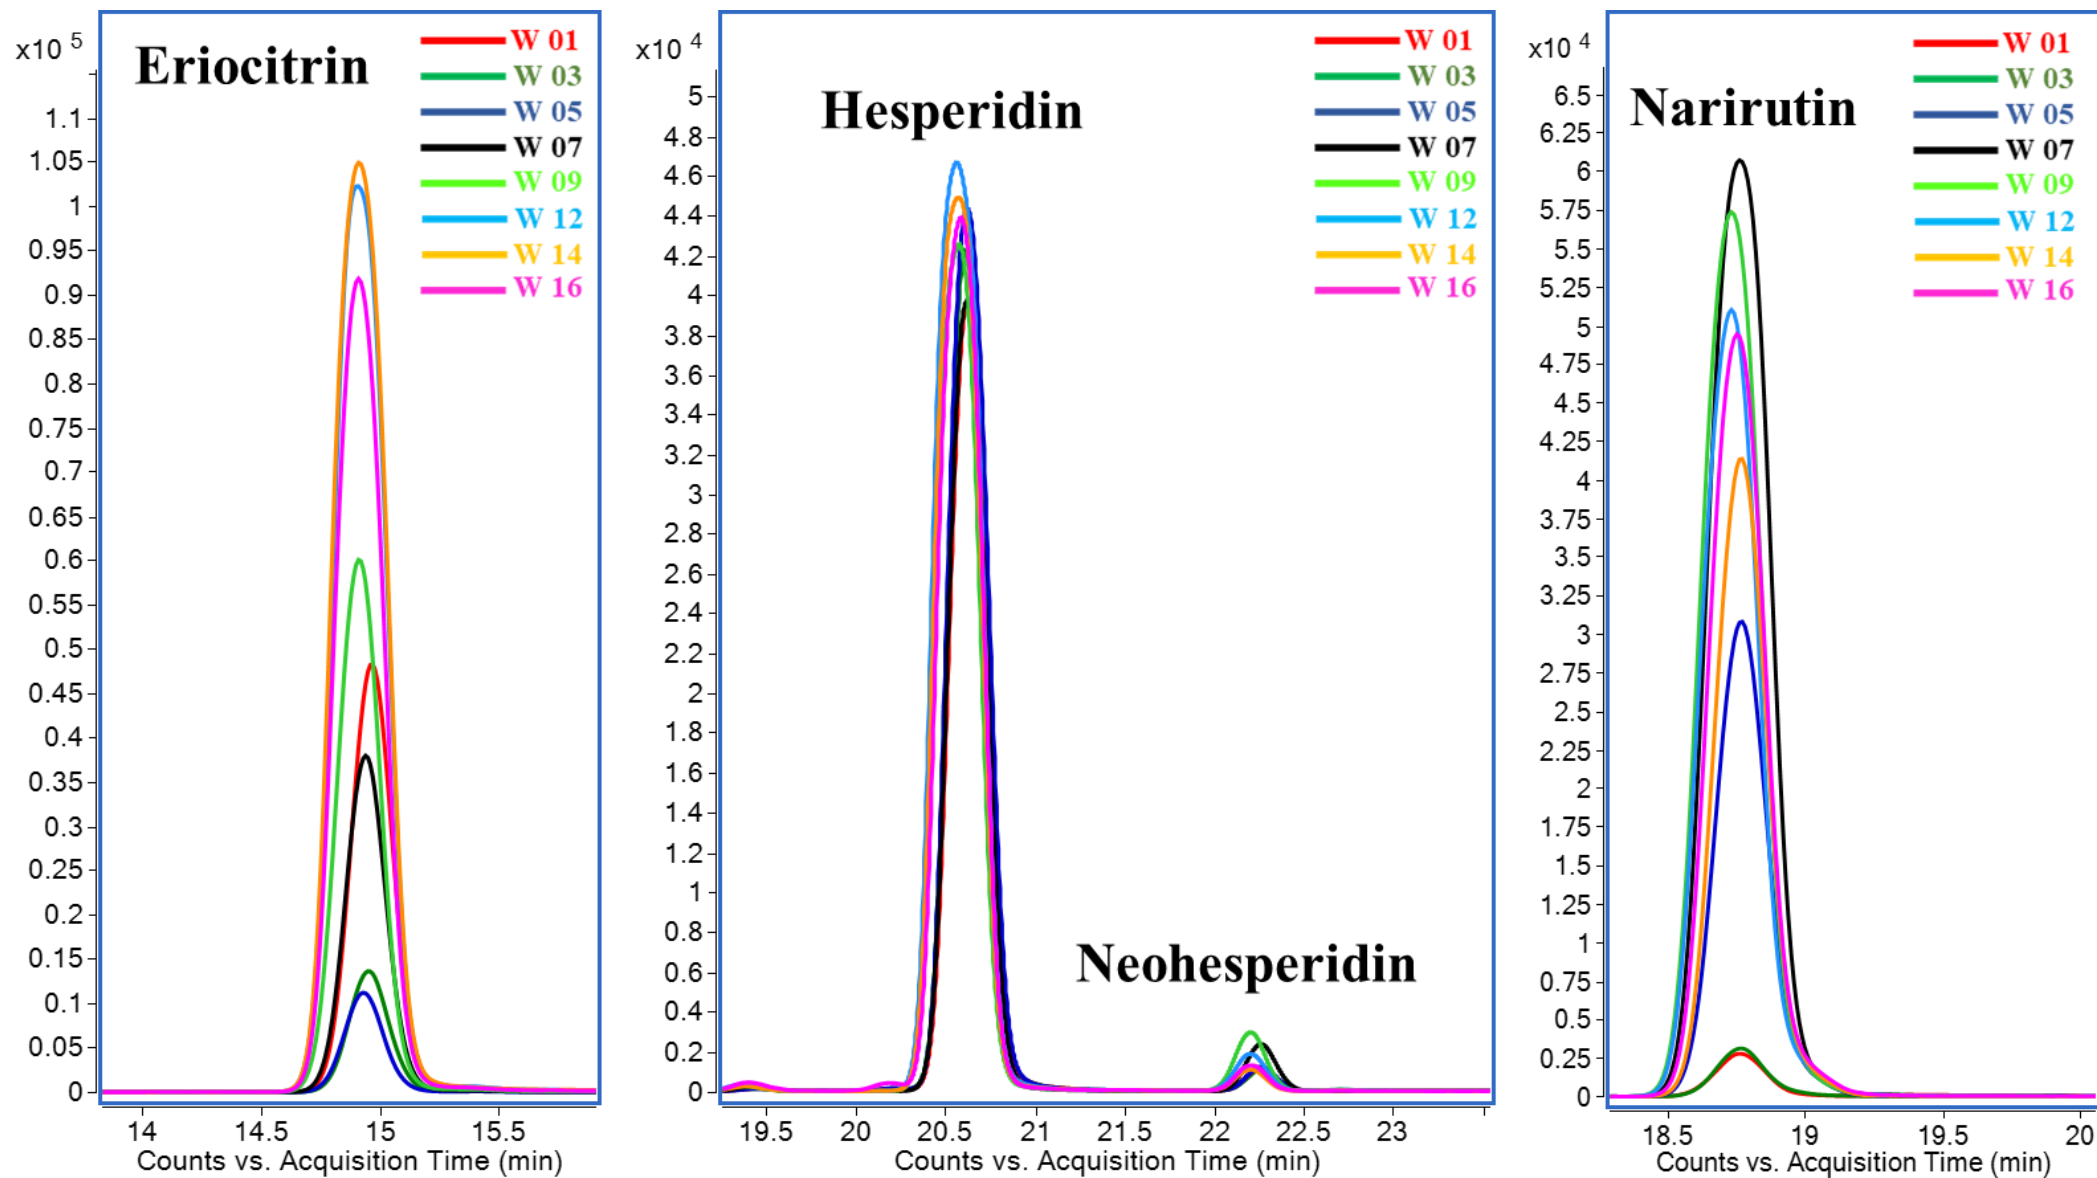

**Supplementary Figure 2.** Chromatograms of the main flavanones from Persian lime at different maturation stages.

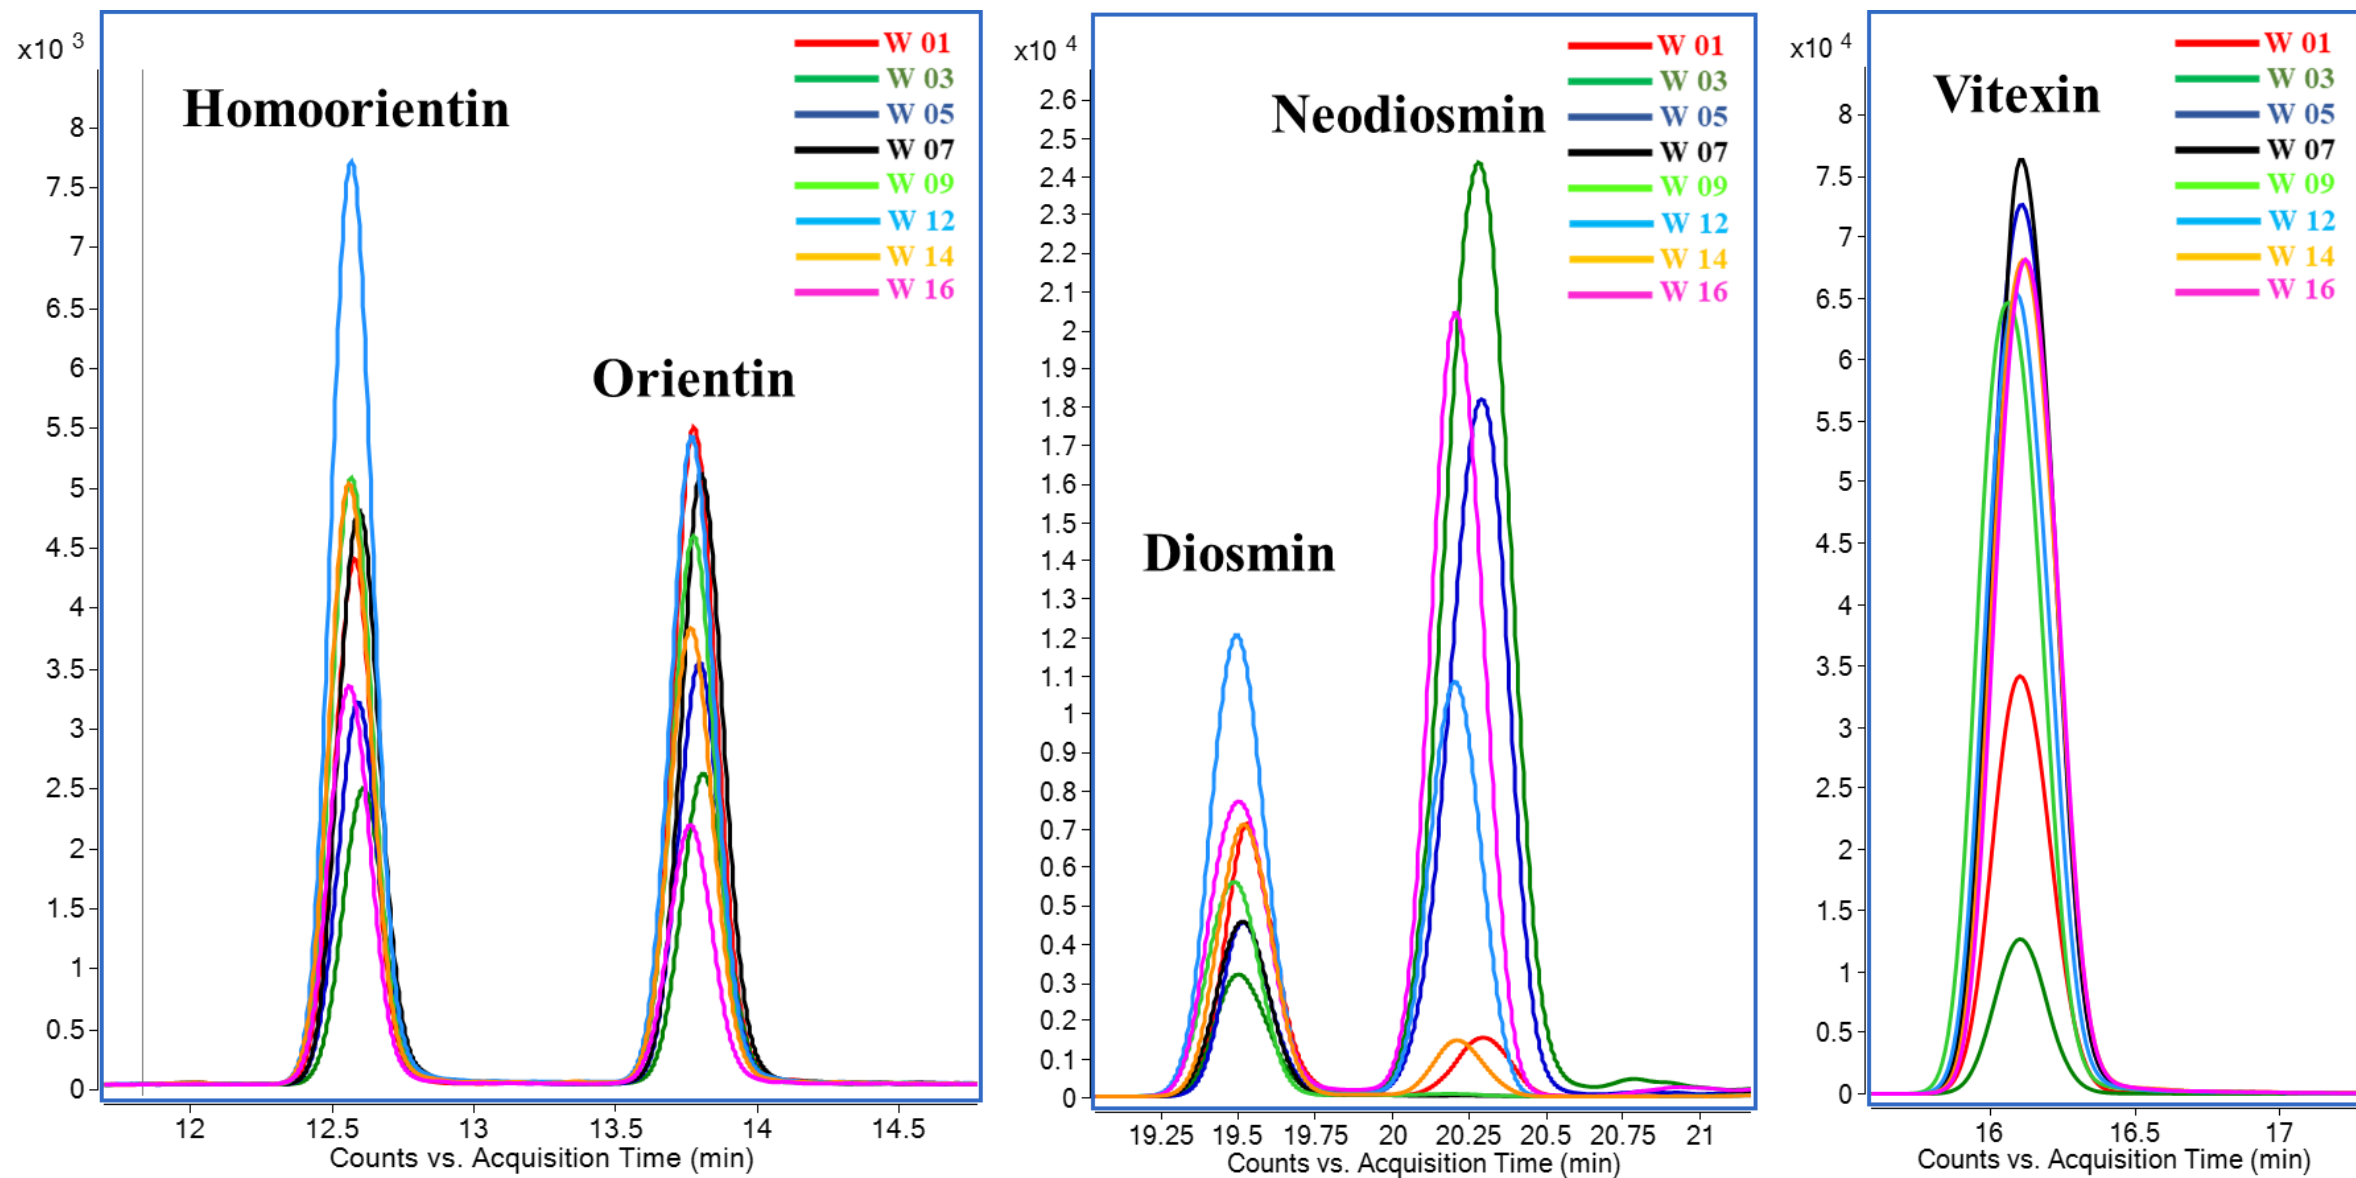

**Supplementary Figure 3.** Chromatograms of the main flavones from Persian lime at different maturation stages.

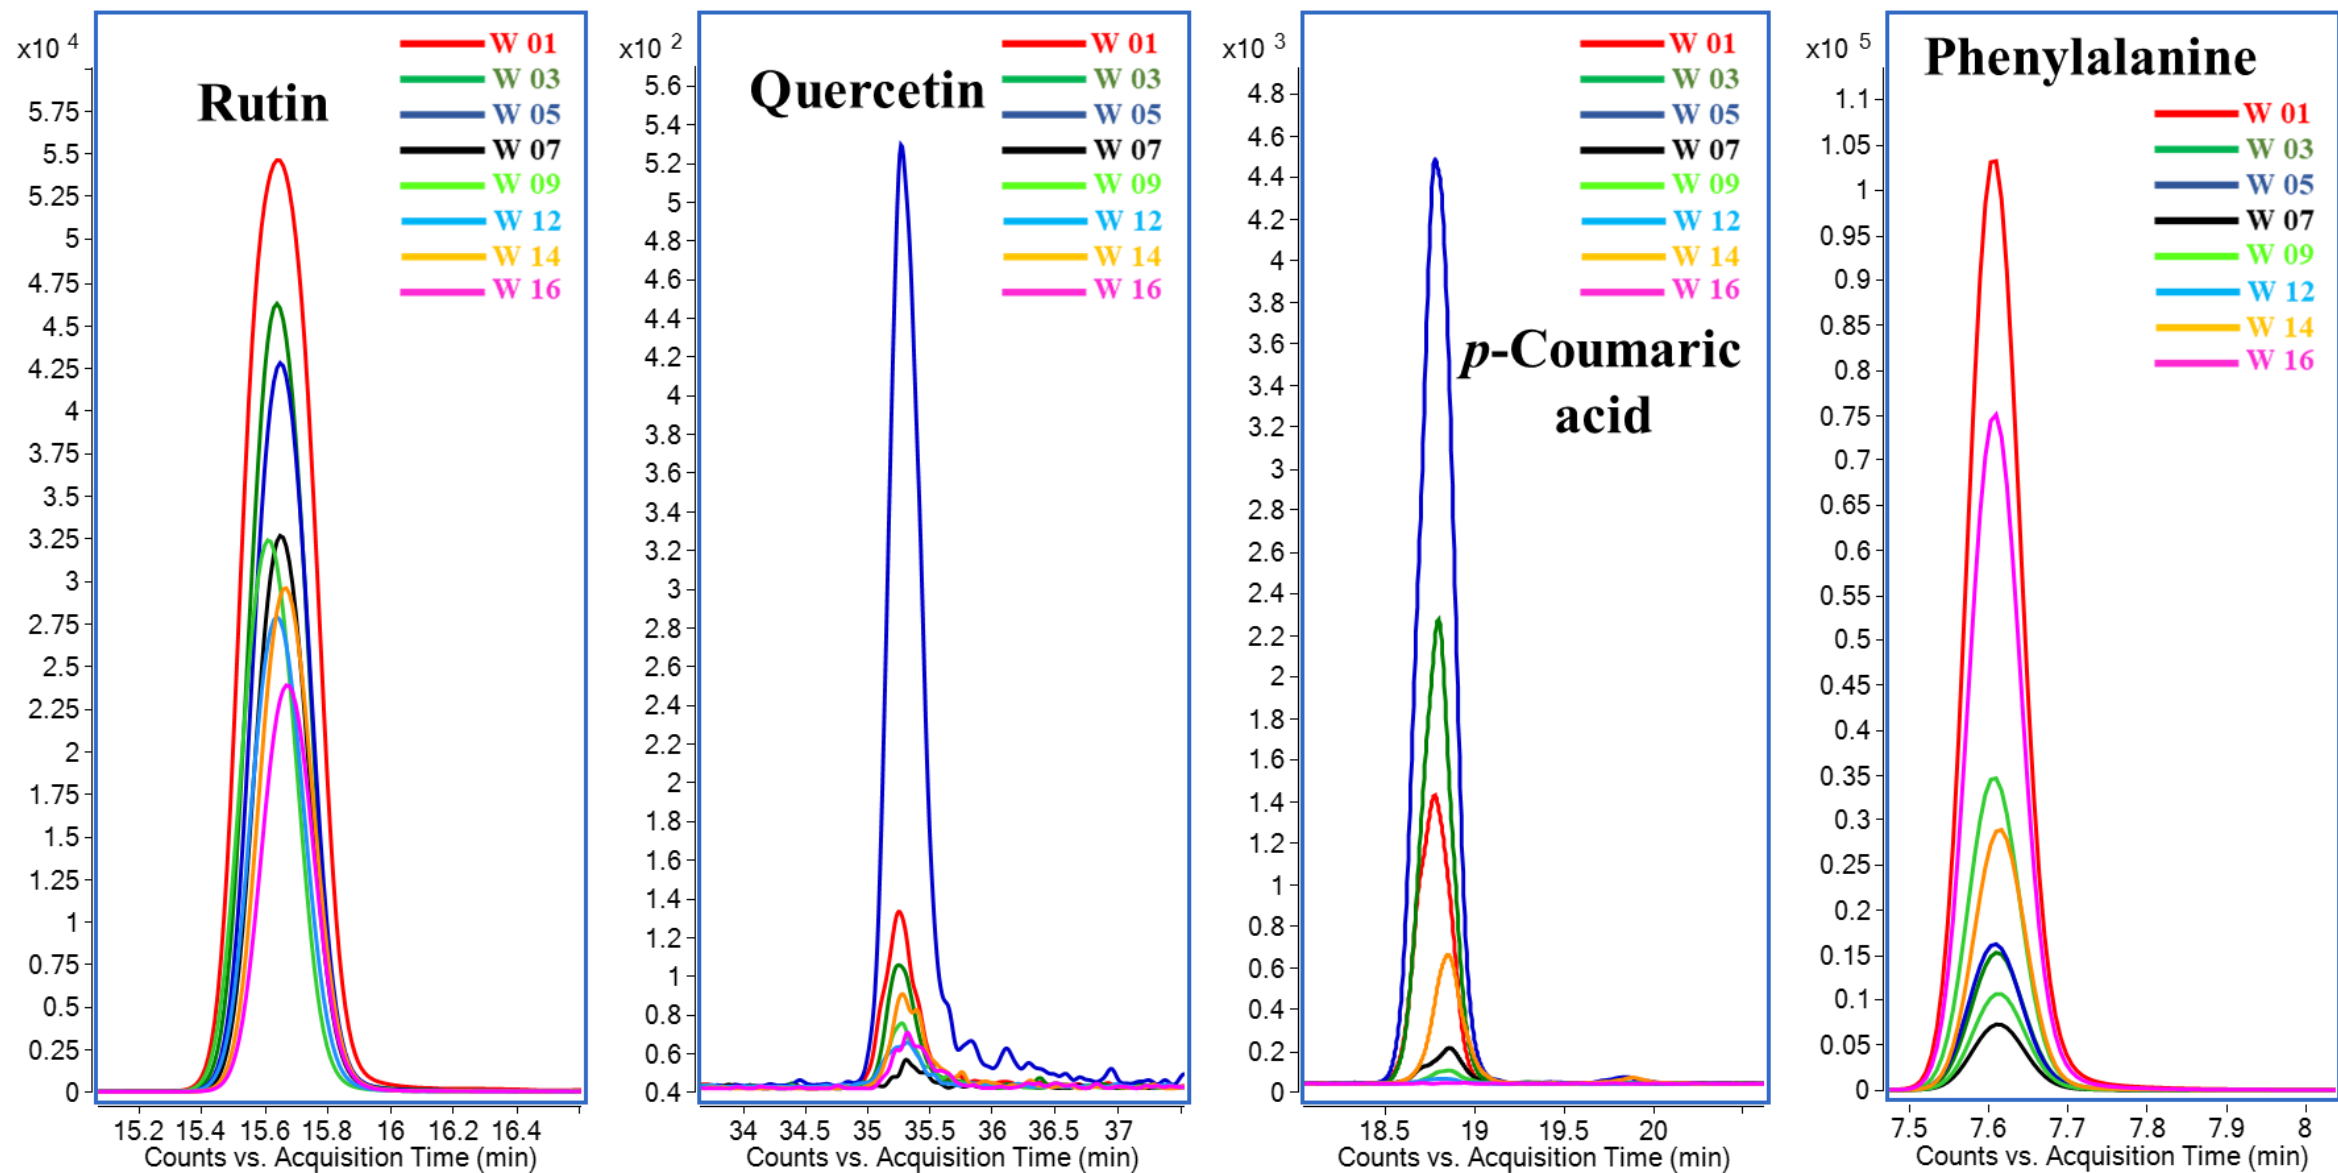

**Supplementary Figure 4.** Chromatograms of the main flavanols, *p*-coumaric acid and phenylalanine from Persian lime at different maturation stages.

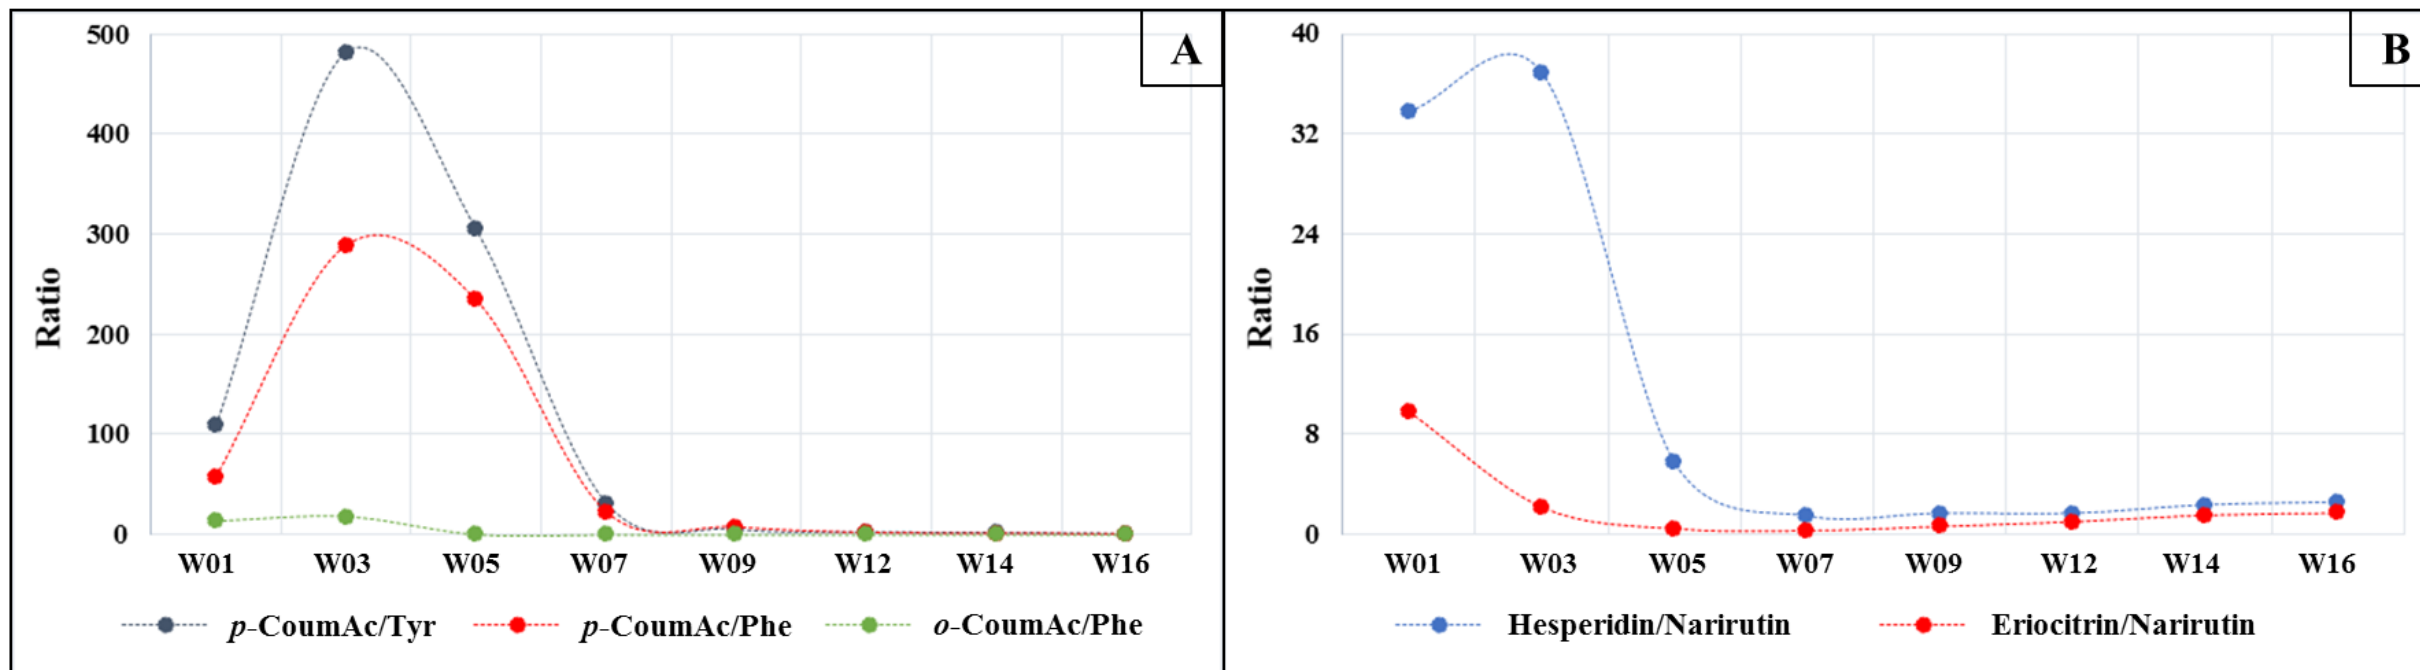

**Supplementary Figure 5.** Conversion ratios of phenylalanine (Phe) and tyrosine (Tyr) into *p*-coumaric acid (*p*-CoumAc) and phenylalanin into *o*-coumaric acid (*o*-CoumAc) (A); and narirutin into either hesperidin or eriocitrin (B).
